# Supplementary material for: The Development of Biomimetic Aligned Skeletal Muscles in a Fully 3D Printed Microfluidic Device
Source: MDPI journal article supplement (doi:10.3390/biomimetics7010002), 2021-12-21
Supplement: s1 [file s1]

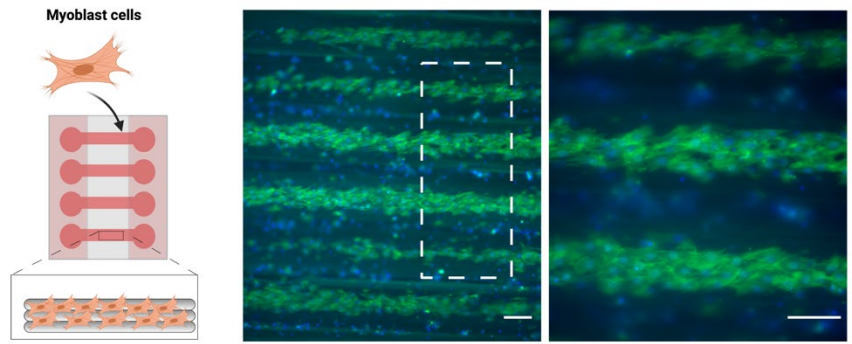

**Figure S1.** C2C12 myoblast cells adherence in 3D-PMMD. Cells were cultured on 3D-PMMD with a micropattern dimension of 200 $\mu$ m (MP2) for three days. Then, the cells' adherence and structure were analyzed by the fluorescence staining of F-actin. Green, F-actin; blue, DAPI; scale bar of 200  $\mu$ m.
